# Supplementary material for: Robotic Esophagectomy. A Systematic Review with Meta-Analysis of Clinical Outcomes
Source: MDPI journal article supplement (doi:10.3390/jpm11070640), 2021-07-06
Supplement: s1 [file s1]

|                              | Robotic                               |                 | Open                                  |                 |
|------------------------------|---------------------------------------|-----------------|---------------------------------------|-----------------|
| AUTHORS                      | <i>Harvested nodes<br/>(means±SD)</i> | <i>Patients</i> | <i>Harvested nodes<br/>(means±SD)</i> | <i>Patients</i> |
| Espinoza-Mercado et al. 2019 | 17 ±2.2                               | 406             | 13 ±2.4                               | 406             |
| Gong et al. 2020             | 22.84 ±8.37                           | 91              | 24.09 ±10.77                          | 77              |
| Mehdorn et al. 2020          | 29.9 ±9.8                             | 11              | 18.1 ±13.8                            | 11              |
| Meredith et al. 2020         | 20 ±9                                 | 144             | 10 ±6                                 | 475             |
| Osaka et al. 2018            | 26.9 ±12.2                            | 30              | 23.6 ±6.6                             | 30              |
| Rolff et al. 2017            | 29.6 ±10                              | 56              | 24 ±9.2                               | 160             |
| Sarkaria et al. 2019         | 26.5 ±9                               | 64              | 22.3 ±9.9                             | 106             |
| van der Sluis et al. 2019    | 26.7 ±3.5                             | 54              | 24.8 ±3                               | 55              |
| Weksler et al. 2017          | 16 ±2.1                               | 569             | 13 ±2.1                               | 569             |
| Yun et al. 2020              | 39.1 ±13.8                            | 130             | 38.3 ±12.9                            | 241             |

SD: Standard Deviation
